# Supplementary material for: Appropriate Lymph Node Dissection Sites for Cancer in the Body and Tail of the Pancreas: A Multicenter Retrospective Study
Source: MDPI journal article supplement (doi:10.3390/cancers14184409), 2022-09-11
Supplement: s1 [file s1]

**Table S1.** Distribution of lymph node metastasis based on tumor site and efficacy index according to the 2-year disease-free survival rate.

|       | <b>Total<br/>patients<br/>n = 235</b> | <b>Pb<br/>n=109</b>                |                            |                                 | <b>Pbt<br/>n=51</b>                |                            |                                 | <b>Pt<br/>n=75</b>                 |                            |                                 |
|-------|---------------------------------------|------------------------------------|----------------------------|---------------------------------|------------------------------------|----------------------------|---------------------------------|------------------------------------|----------------------------|---------------------------------|
|       | <b>Frequency<br/>of metastasis</b>    | <b>Frequency<br/>of metastasis</b> | <b>2-year<br/>DFS rate</b> | <b>2-year<br/>DFS<br/>index</b> | <b>Frequency<br/>of metastasis</b> | <b>2-year<br/>DFS rate</b> | <b>2-year<br/>DFS<br/>index</b> | <b>Frequency<br/>of metastasis</b> | <b>2-year<br/>DFS rate</b> | <b>2-year<br/>DFS<br/>index</b> |
| #8a/p | 18 (7.7%)                             | 12 (11.0%)                         | 36.36                      | 4.00                            | 4 (7.8%)                           | 75.00                      | 5.85                            | 2 (2.7%)                           | 0.00                       | 0.0                             |
| #10   | 16 (6.8%)                             | 0                                  | N.A.                       | N.A.                            | 4 (7.8%)                           | 0.00                       | 0.0                             | 12 (16.0%)                         | 58.33                      | 9.33                            |
| #11d  | 47 (20.0%)                            | 5 (4.6%)                           | 20.00                      | 0.92                            | 14 (27.5%)                         | 15.38                      | 4.23                            | 28 (37.3%)                         | 33.33                      | 12.43                           |
| #11p  | 62 (26.4%)                            | 39 (35.8%)                         | 32.43                      | 11.61                           | 13 (25.5%)                         | 33.85                      | 8.63                            | 10 (13.3%)                         | 62.50                      | 8.31                            |
| #14p  | 3 (1.3%)                              | 1 (0.9%)                           | 0.00                       | 0.0                             | 1 (2.0%)                           | 0.00                       | 0.0                             | 1 (1.3%)                           | 0.00                       | 0.0                             |
| #16b1 | 5 (2.1%)                              | 2 (1.8%)                           | 0.00                       | 0.0                             | 1 (2.0%)                           | 0.00                       | 0.0                             | 2 (2.7%)                           | 0.00                       | 0.0                             |
| #18   | 37 (15.7%)                            | 17 (15.6%)                         | 18.75                      | 2.93                            | 8 (15.7%)                          | 25.00                      | 3.93                            | 12 (16.0%)                         | 36.36                      | 5.82                            |

Pb, pancreatic body (and/or neck); Pbt, pancreatic body and tail; Pt, pancreatic tail; DFS, disease-free survival; #8a/p, lymph nodes (LNs) along the common hepatic artery; #10, LNs at the splenic hilum; #11d, LNs along the distal splenic artery; #11p, LNs along the proximal splenic artery; #14p, LNs along the proximal superior mesenteric artery; #16b1, LNs around the abdominal aorta; #18, LNs along the inferior margin of the pancreas; N.A., not applicable
